# Supplementary material
Source: Springer Nature journal article supplement (https://www.springermedizin.de/resource/supplementary/40478_2013_134_MOESM10_ESM.pdf/25658058)
Supplement: MOESM10 [file 25658058]

**Title:** The *Arctic APP* mutation leads to Alzheimer's disease pathology with highly variable topographic deposition of differentially truncated A $\beta$

**Journal:** Acta Neuropathologica Communications

**Authors:** Hannu Kalimo<sup>1</sup>, Maciej Lalowski, Nenad Bogdanovic, Ola Philipson, Thomas D. Bird, David Nochlin, Gerard D. Schellenberg, RoseMarie Brundin, Tommie Olofsson, Marc Baumann, Oliver Wirths, Thomas A. Bayer, Lars N.G. Nilsson, Hans Basun, Lars Lannfelt, Martin Ingelsson

**Corresponding author:** <sup>1</sup>Hannu Kalimo, Department of Pathology, University and University Hospital of Helsinki, Helsinki, Finland,

**E-mail:** hannu.kalimo@helsinki.fi

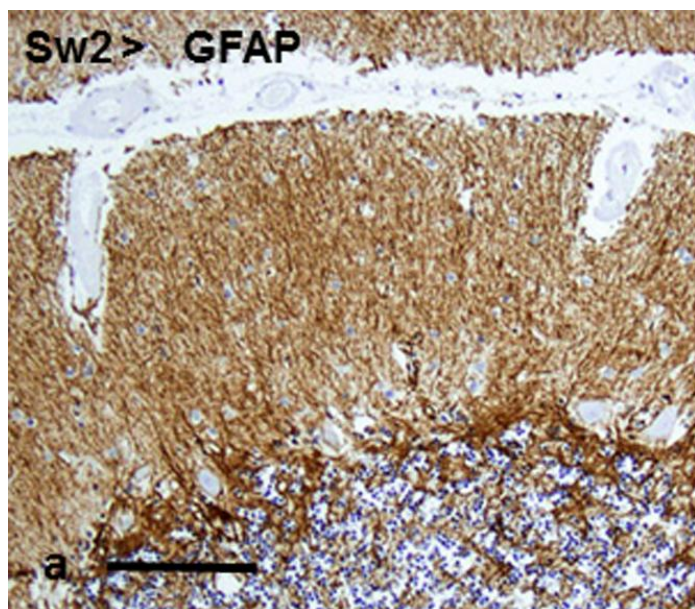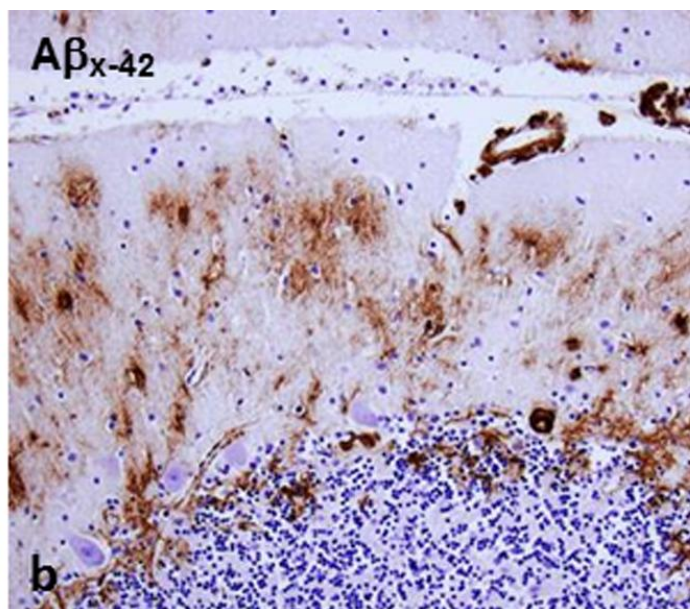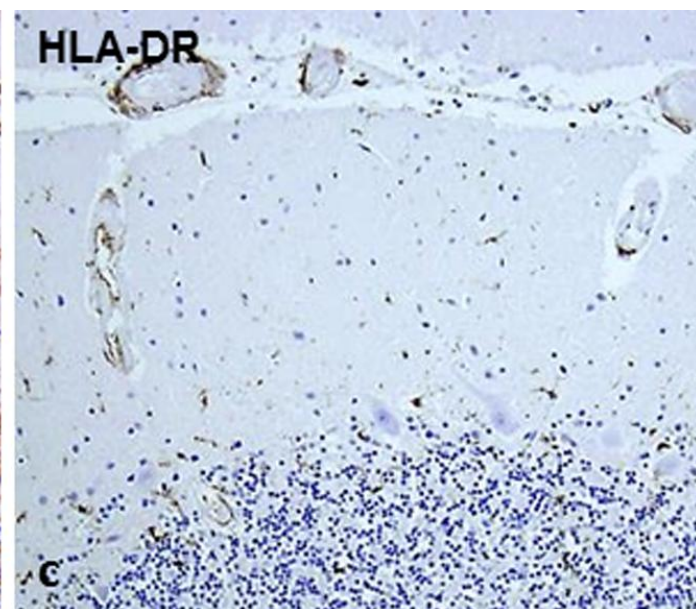

**Suppl. Fig. 8** Sw2 patient's cerebellum. **a:** The density of GFAP-positive network is prominent, especially in the molecular layer. **b:** The density of the network corresponds to the deposition of A $\beta$  in the Purkinje cell layer, but it differs from the perivascular perivascular accentuation of A $\beta$  in the molecular layer. **c:** The microglial reaction to A $\beta$  is minimal (*bar* in **a** 200  $\mu$ m for all panels)
